# Supplementary material for: Hydroxychloroquine/chloroquine for the treatment of hospitalized patients with COVID-19: An individual participant data meta-analysis
Source: bioRxiv or medRxiv preprint supplement (doi:10.1101/2022.01.10.22269008), 2022-08-16
Supplement: Supplementary file [file media-3.pdf]

## S1 Table. Data Dictionary from Data Harmonization Spreadsheet

In addition to the variables below, we requested inclusion and exclusion criteria from each trial.

| Variable                                | Format                                                                                                                                                                                                                                                                                                                                                                                                                          | Description and comments                                                                                                             |
|-----------------------------------------|---------------------------------------------------------------------------------------------------------------------------------------------------------------------------------------------------------------------------------------------------------------------------------------------------------------------------------------------------------------------------------------------------------------------------------|--------------------------------------------------------------------------------------------------------------------------------------|
| Patient ID                              | (Study-specific format)                                                                                                                                                                                                                                                                                                                                                                                                         |                                                                                                                                      |
| Other ID(s)                             | (Study-specific format)                                                                                                                                                                                                                                                                                                                                                                                                         |                                                                                                                                      |
| Treatment group                         | (Study-specific format)                                                                                                                                                                                                                                                                                                                                                                                                         |                                                                                                                                      |
| Enrollment date (year)                  | YYYY                                                                                                                                                                                                                                                                                                                                                                                                                            | Year of enrollment                                                                                                                   |
| Enrollment date (month)                 | Numeric (1-12)                                                                                                                                                                                                                                                                                                                                                                                                                  | Month of enrollment                                                                                                                  |
| Symptom onset date                      | Numeric (days)                                                                                                                                                                                                                                                                                                                                                                                                                  | Enrollment date - symptom onset date                                                                                                 |
| Screening date                          | Numeric (days)                                                                                                                                                                                                                                                                                                                                                                                                                  | Enrollment date - screening date                                                                                                     |
| Admission date                          | Numeric (days)                                                                                                                                                                                                                                                                                                                                                                                                                  | Enrollment date - admission date                                                                                                     |
| Randomization date                      | Numeric (days)                                                                                                                                                                                                                                                                                                                                                                                                                  | Randomization date - enrollment date                                                                                                 |
| Date of first dose                      | Numeric (days)                                                                                                                                                                                                                                                                                                                                                                                                                  | Date of first dose - date of enrollment (numeric; days)                                                                              |
| Date of last dose                       | Numeric (days)                                                                                                                                                                                                                                                                                                                                                                                                                  | Date of last dose - date of enrollment                                                                                               |
| Ordinal outcome scale                   | Ordinal scale<br>1 = Death<br>2 = Hospitalized, on invasive mechanical ventilation or extracorporeal membrane oxygenation (ECMO)<br>3 = Hospitalized, on non-invasive ventilation or high-flow oxygen devices<br>4 = Hospitalized, requiring supplemental oxygen<br>5 = Hospitalized, not requiring supplemental oxygen<br>6 = Not hospitalized, limitation on activities<br>7 = Not hospitalized, no limitations on activities | Baseline ordinal scales as well as all available through day 30 post enrollment (Day 0, Day 7, Day 14, Day 28/30 are most important) |
| Date at which ordinal scale is measured | Numeric (days)                                                                                                                                                                                                                                                                                                                                                                                                                  | Date of ordinal outcome status – date of enrollment                                                                                  |
| Hospitalization length of stay          | Numeric (days)                                                                                                                                                                                                                                                                                                                                                                                                                  | Duration in days between enrollment and day 28/30 post enrollment                                                                    |
| Duration of mechanical ventilation      | Numeric (days)                                                                                                                                                                                                                                                                                                                                                                                                                  | Duration in days between enrollment and day 28/30 post enrollment                                                                    |
| All-cause mortality                     | 1 = Yes, 0 = No                                                                                                                                                                                                                                                                                                                                                                                                                 | Between enrollment and day 28/30 post enrollment                                                                                     |
| All-cause mortality – date of death     | Numeric (days)                                                                                                                                                                                                                                                                                                                                                                                                                  | Between enrollment and day 28/30 post enrollment                                                                                     |
| Number of AEs                           | Numeric (count)                                                                                                                                                                                                                                                                                                                                                                                                                 | Between enrollment and day 28/30 post enrollment                                                                                     |
| Number of SAEs                          | Numeric (count)                                                                                                                                                                                                                                                                                                                                                                                                                 | Between enrollment and day 28/30 post enrollment                                                                                     |
| Number of AEs for QTC Prolongation      | Numeric (count)                                                                                                                                                                                                                                                                                                                                                                                                                 | Between enrollment and day 28/30 post enrollment                                                                                     |

| Variable                                                 | Format                                                                                                                                                                                                    | Description and comments                                                        |
|----------------------------------------------------------|-----------------------------------------------------------------------------------------------------------------------------------------------------------------------------------------------------------|---------------------------------------------------------------------------------|
| Number of SAEs for QTC Prolongation                      | Numeric (count)                                                                                                                                                                                           | Between enrollment and day 28/30 post enrollment                                |
| Number of AEs for elevated liver function test           | Numeric (count)                                                                                                                                                                                           | Between enrollment and day 28/30 post enrollment                                |
| Number of SAEs for elevated liver function test          | Numeric (count)                                                                                                                                                                                           | Between enrollment and day 28/30 post enrollment                                |
| Number of AEs for arrhythmia or cardiac arrest           | Numeric (count)                                                                                                                                                                                           | Between enrollment and day 28/30 post enrollment                                |
| Number of SAEs for arrhythmia or cardiac arrest          | Numeric (count)                                                                                                                                                                                           | Between enrollment and day 28/30 post enrollment                                |
| Age                                                      | Numeric (years)                                                                                                                                                                                           | Age rounded <i>down</i> to beginning of 5-year bracket – e.g., 43 → 40; 39 → 35 |
| Sex                                                      | 1 = Male, 2 = Female                                                                                                                                                                                      |                                                                                 |
| Race                                                     | 1 = American Indian/Alaska Native;<br>2 = Asian;<br>3 = Black/African American;<br>4 = Native Hawaiian/Pacific Islander;<br>5 = White;<br>6 = Multiple;<br>7 = Other/declined;<br>8 = Unknown/unavailable |                                                                                 |
| Ethnicity                                                | 0 = Not of Hispanic, Latinx, or Spanish origin<br>1 = Hispanic, Latinx, or Spanish origin<br>2 = Unknown                                                                                                  |                                                                                 |
| BMI                                                      | numeric                                                                                                                                                                                                   |                                                                                 |
| On mechanical ventilation at enrollment                  | 1 = Yes, 0 = No                                                                                                                                                                                           |                                                                                 |
| AIDS (do not include HIV-positive without AIDS criteria) | 1 = Yes, 0 = No                                                                                                                                                                                           |                                                                                 |
| Cerebrovascular disease                                  | 1 = Yes, 0 = No                                                                                                                                                                                           |                                                                                 |
| A prior myocardial infarction                            | 1 = Yes, 0 = No                                                                                                                                                                                           |                                                                                 |
| Congestive heart failure                                 | 1 = Yes, 0 = No                                                                                                                                                                                           |                                                                                 |
| Dementia                                                 | 1 = Yes, 0 = No                                                                                                                                                                                           |                                                                                 |
| COPD                                                     | 1 = Yes, 0 = No                                                                                                                                                                                           |                                                                                 |
| Asthma                                                   | 1 = Yes, 0 = No                                                                                                                                                                                           |                                                                                 |
| History of hypertension                                  | 1 = Yes, 0 = No                                                                                                                                                                                           |                                                                                 |
| HIV positive (without AIDS)                              | 1 = Yes, 0 = No                                                                                                                                                                                           |                                                                                 |
| Solid tumor                                              | 1 = Yes, 0 = No                                                                                                                                                                                           |                                                                                 |
| Liver disease                                            | 1 = Yes, 0 = No                                                                                                                                                                                           |                                                                                 |
| Diabetes mellitus                                        | 1 = Yes, 0 = No                                                                                                                                                                                           |                                                                                 |
| Cigarette or tobacco smoking                             | 1 = Yes, 0 = No                                                                                                                                                                                           |                                                                                 |
| Vaping                                                   | 1 = Yes, 0 = No                                                                                                                                                                                           |                                                                                 |
| Concurrent corticosteroid use                            | 1 = Yes, 0 = No                                                                                                                                                                                           |                                                                                 |
| Concurrent azithromycin use                              | 1 = Yes, 0 = No                                                                                                                                                                                           |                                                                                 |
