# Supplementary material for: Hydroxychloroquine/chloroquine for the treatment of hospitalized patients with COVID-19: An individual participant data meta-analysis
Source: bioRxiv or medRxiv preprint supplement (doi:10.1101/2022.01.10.22269008), 2022-08-16
Supplement: Supplementary file [file media-8.pdf]

**S3 Fig. Estimated Mortality Rate in Subgroups Under Both Control and HCQ/CQ**

**Mortality at day 28-35**

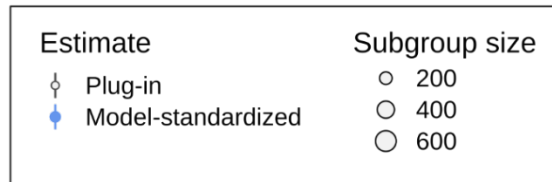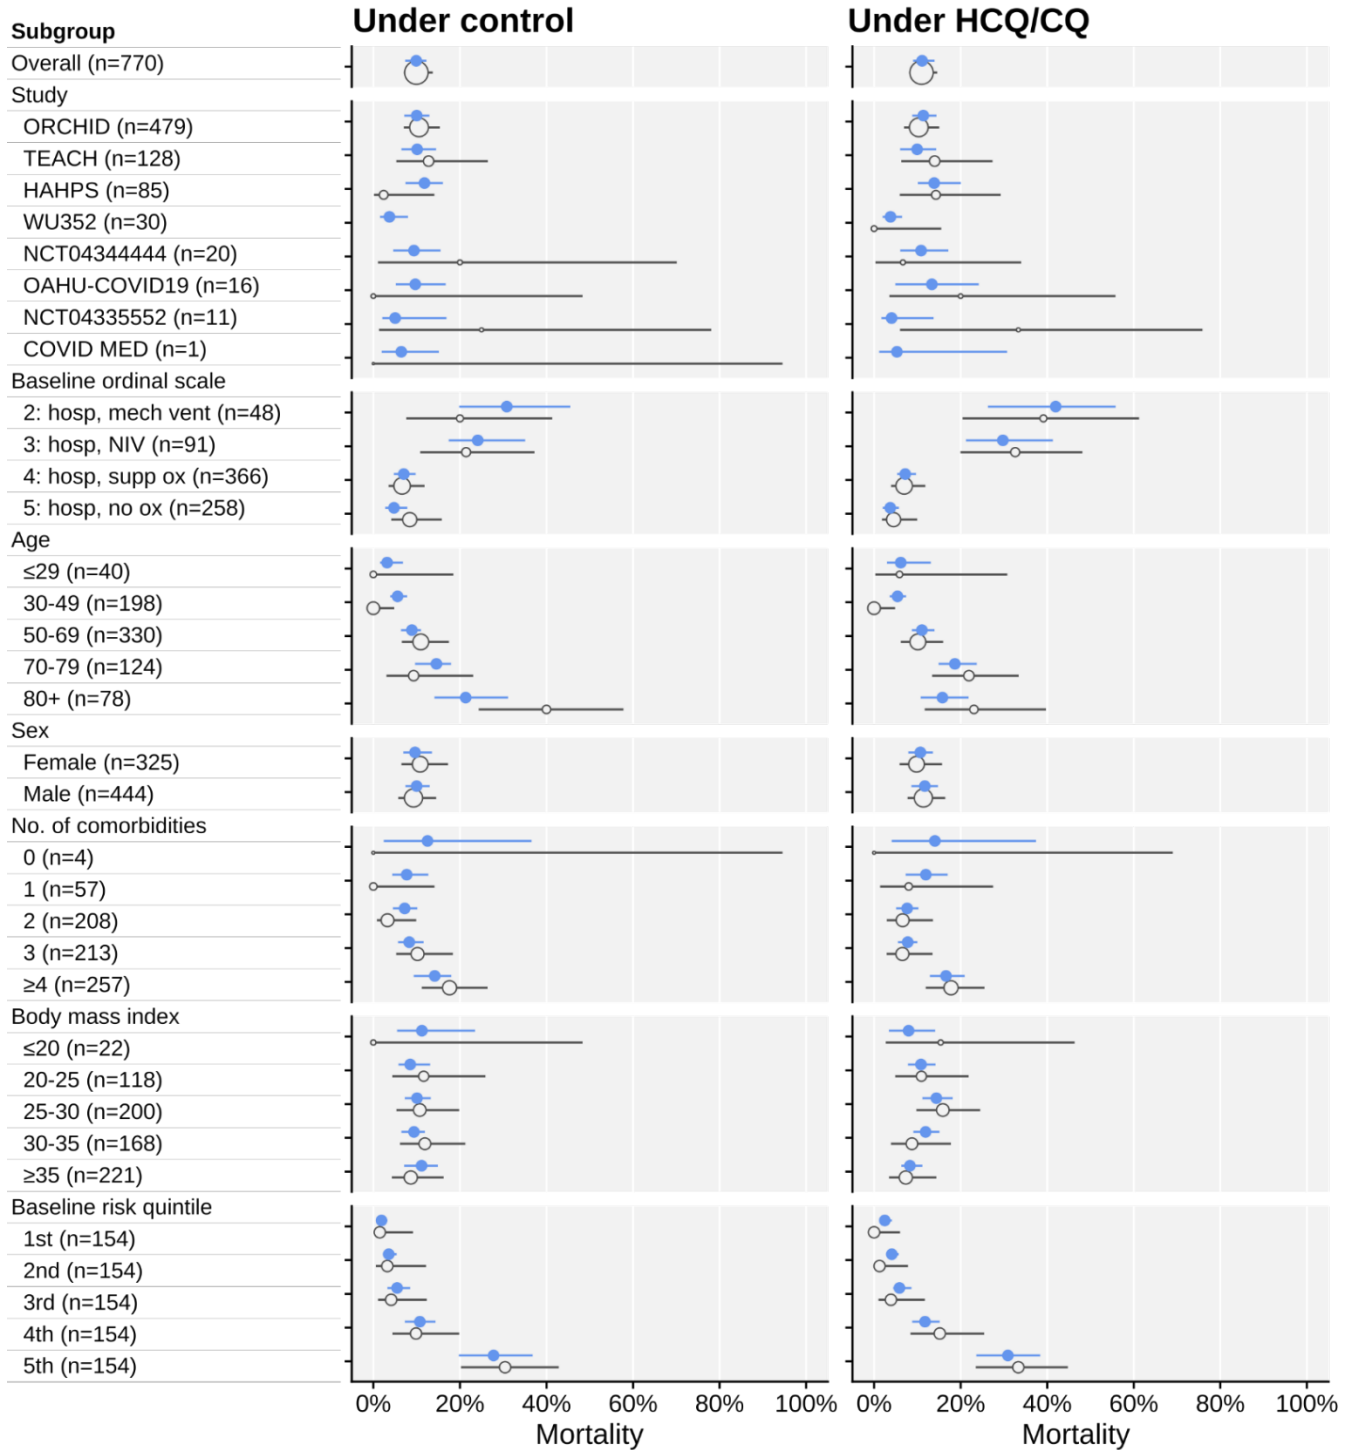

Shown are both plug-in estimates (based on the proportion of deaths in each subgroup) along with 95% CIs, and model-adjusted estimates with 95% credible intervals. The model used is the same as for the primary outcome analysis.

HCQ/CQ indicates hydroxychloroquine or chloroquine.
