# Supplementary material for: Hydroxychloroquine/chloroquine for the treatment of hospitalized patients with COVID-19: An individual participant data meta-analysis
Source: bioRxiv or medRxiv preprint supplement (doi:10.1101/2022.01.10.22269008), 2022-08-16
Supplement: Supplementary file [file media-11.pdf]

**S4 Table. Primary, Secondary, and Safety Outcomes**

| Trial              | Primary outcome                                                                                                                                                                                                                                                                                                                                                                                               | Secondary outcomes                                                                                                                                                                                                                                                                                                                                                                                                                                                                                                                                                                                                                                                                                                                                                                                                                                                                     | Safety outcomes                                                                                                                                                                                                                                                                                                                                                          |
|--------------------|---------------------------------------------------------------------------------------------------------------------------------------------------------------------------------------------------------------------------------------------------------------------------------------------------------------------------------------------------------------------------------------------------------------|----------------------------------------------------------------------------------------------------------------------------------------------------------------------------------------------------------------------------------------------------------------------------------------------------------------------------------------------------------------------------------------------------------------------------------------------------------------------------------------------------------------------------------------------------------------------------------------------------------------------------------------------------------------------------------------------------------------------------------------------------------------------------------------------------------------------------------------------------------------------------------------|--------------------------------------------------------------------------------------------------------------------------------------------------------------------------------------------------------------------------------------------------------------------------------------------------------------------------------------------------------------------------|
| ORCHID             | COVID Ordinal Outcomes Scale on Study Day 15                                                                                                                                                                                                                                                                                                                                                                  | <ul style="list-style-type: none"> <li>• Time to recovery, defined as time to reaching level 5, 6, or 7 on the COVID Outcomes Scale, which is the time to the earlier of final liberation from supplemental oxygen or hospital discharge</li> <li>• All-location, all-cause 14-day mortality (assessed on Study Day 15)</li> <li>• All-location, all-cause 28-day mortality (assessed on Study Day 29)</li> <li>• COVID Ordinal Outcomes Scale on Study Day 3</li> <li>• COVID Ordinal Outcomes Scale on Study Day 8</li> <li>• COVID Ordinal Outcomes Scale on Study Day 29</li> <li>• Composite of death or receipt of ECMO through Day 28</li> <li>• Oxygen-free days through Day 28</li> <li>• Ventilator-free days through Day 28</li> <li>• Vasopressor-free days through Day 28</li> <li>• ICU-free days through Day 28</li> <li>• Hospital-free days through Day 28</li> </ul> | <ul style="list-style-type: none"> <li>• Seizure</li> <li>• Atrial or ventricular arrhythmia</li> <li>• Cardiac arrest</li> <li>• Elevation in aspartate, aminotransferase, or alanine aminotransferase to twice the local upper limit of normal</li> <li>• Acute pancreatitis</li> <li>• Acute kidney injury</li> <li>• Receipt of renal replacement therapy</li> </ul> |
| WU352              | Time (hours) from randomization to recovery defined as (1) absence of fever, as defined as at least 48 hours since last temperature $\geq 38.0^{\circ}\text{C}$ without the use of fever-reducing medications AND (2) absence of symptoms of greater than mild severity for 24 hours AND (3) not requiring supplemental oxygen beyond pre-COVID baseline AND (4) freedom from mechanical ventilation or death | <ul style="list-style-type: none"> <li>• Time to resolution of fever defined as at least 48 hours since last temperature <math>\geq 38.0^{\circ}\text{C}</math> without the use of fever-reducing medications</li> <li>• Time to improvement in symptoms (scored as mild or absent and remained so for 24 hour)</li> <li>• Mean improvement in symptom from baseline</li> <li>• Duration of hospitalization</li> <li>• Proportion requiring supplementary oxygen (above baseline usage) at any time during follow-up</li> <li>• Duration (days) of requirement for supplementary oxygen</li> <li>• Proportion requiring ICU admission at any time during follow-up</li> <li>• Proportion requiring mechanical ventilation at any time during follow-up</li> <li>• Ventilator free days</li> <li>• All-cause mortality</li> </ul>                                                       | <ul style="list-style-type: none"> <li>• Serious Adverse Events that occur within 6 weeks after randomization</li> <li>• Unanticipated problem (UP)</li> <li>• Unexpected adverse drug event (UADE)</li> </ul>                                                                                                                                                           |
| NCT04335552 (Duke) | WHO ordinal scale measured at 14 days after enrollment                                                                                                                                                                                                                                                                                                                                                        | <ul style="list-style-type: none"> <li>• Death during the index hospitalization</li> <li>• Number of days on mechanical ventilation</li> <li>• Proportion of patients not receiving mechanical ventilation at baseline who progress to requiring mechanical ventilation</li> </ul>                                                                                                                                                                                                                                                                                                                                                                                                                                                                                                                                                                                                     | <ul style="list-style-type: none"> <li>• Arrhythmias (ventricular)</li> <li>• Hepatic failure</li> <li>• Bone marrow failure</li> <li>• Aplastic anemia</li> </ul>                                                                                                                                                                                                       |

| Trial     | Primary outcome                                                                                                                                                                                                                                              | Secondary outcomes                                                                                                                                                                                                                                                                                                                                                                                                                                                                                                                                                                                                                                                                                                                                                                                                                                                                                                                                                                                                                                                                                        | Safety outcomes                                                                                                                                                                                                                                                                                                                                    |
|-----------|--------------------------------------------------------------------------------------------------------------------------------------------------------------------------------------------------------------------------------------------------------------|-----------------------------------------------------------------------------------------------------------------------------------------------------------------------------------------------------------------------------------------------------------------------------------------------------------------------------------------------------------------------------------------------------------------------------------------------------------------------------------------------------------------------------------------------------------------------------------------------------------------------------------------------------------------------------------------------------------------------------------------------------------------------------------------------------------------------------------------------------------------------------------------------------------------------------------------------------------------------------------------------------------------------------------------------------------------------------------------------------------|----------------------------------------------------------------------------------------------------------------------------------------------------------------------------------------------------------------------------------------------------------------------------------------------------------------------------------------------------|
|           |                                                                                                                                                                                                                                                              | during the index hospitalization <ul style="list-style-type: none"> <li>• WHO ordinal scale measured at 28 days after enrollment</li> <li>• Hospital length of stay in days for the index hospitalization</li> <li>• Days of fever (temperature <math>\geq 38.0</math>) after randomization</li> <li>• Days on supplemental oxygen after randomization</li> <li>• All-cause study medication discontinuation</li> <li>• Drug-associated adverse events of special interest</li> </ul>                                                                                                                                                                                                                                                                                                                                                                                                                                                                                                                                                                                                                     | <ul style="list-style-type: none"> <li>• Prolonged QT interval</li> <li>• Angioedema</li> <li>• Exfoliative dermatitis</li> <li>• Acute generalized exanthematous pustulosis (AGEP)</li> <li>• Psychosis</li> <li>• Suicidal ideation</li> <li>• Seizure</li> <li>• SAEs that occur between initial dose of study medication and day 14</li> </ul> |
| TEACH     | A severe disease progression composite endpoint defined by the occurrence of any of the following: mortality, ICU admission, invasive mechanical ventilation, ECMO, and/or hypotension requiring vasopressor support by the 14-day post-treatment evaluation | <ul style="list-style-type: none"> <li>• Composite outcome (mortality, ICU admission, invasive mechanical ventilation, ECMO, and/or hypotension requiring vasopressor support) at 30 days</li> <li>• Individual components of the composite endpoint (mortality, ICU admission, invasive mechanical ventilation, ECMO, and/or hypotension requiring vasopressor support) by EOT, PTE, and 30 days of treatment</li> <li>• Hospital length of stay</li> <li>• Days of fever</li> <li>• Days of non-invasive ventilator use</li> <li>• Days of non-rebreather mask oxygen supplementation</li> <li>• Cytokine release syndrome grading scale</li> <li>• Percentage of subjects reporting each severity score on 8-point ordinal scale D1 and EOT</li> <li>• Percentage of subjects with QTc prolongation at EOT</li> <li>• SARS-CoV-2 viral eradication from nasopharyngeal specimens at EOT, measured by RT-PCR</li> <li>• Change from baseline AST, ALT, creatinine, glucose, white blood cell count, lymphocyte percentage, hemoglobin, platelets, total bilirubin, LDH, CRP, and IL-6 at EOT</li> </ul> | <ul style="list-style-type: none"> <li>• Primary Safety Composite: Cumulative incidence of SAEs through day 30, grade 3 or 4 AEs through day 30, and/or discontinuation of therapy (for any reason)</li> </ul>                                                                                                                                     |
| COVID MED | NIAID COVID-19 Ordinal Severity Score                                                                                                                                                                                                                        | <ul style="list-style-type: none"> <li>• Mortality</li> <li>• Hospital/ICU/ventilator length of stay (LOS)</li> <li>• Reason for ventilator discontinuation (if applicable)</li> <li>• Antibiotics use</li> <li>• Symptoms-based COVID-19 severity score</li> </ul>                                                                                                                                                                                                                                                                                                                                                                                                                                                                                                                                                                                                                                                                                                                                                                                                                                       | <ul style="list-style-type: none"> <li>• Complications</li> <li>• AEs/SAEs</li> </ul>                                                                                                                                                                                                                                                              |
| HAHPS     | WHO COVID Ordinal Outcomes Scale at 14 days                                                                                                                                                                                                                  | <ul style="list-style-type: none"> <li>• Hospital-free days at 28 days (calculated as a worst-rank ordinal)</li> <li>• Ventilator-free days at 28 days (calculated as a worst-rank ordinal)</li> </ul>                                                                                                                                                                                                                                                                                                                                                                                                                                                                                                                                                                                                                                                                                                                                                                                                                                                                                                    | <ul style="list-style-type: none"> <li>• Counts (proportions) of adverse events</li> <li>• Those listed in the package insert for hydroxychloroquine and azithromycin</li> <li>• QT interval</li> </ul>                                                                                                                                            |

| Trial                                                  | Primary outcome                                                                                            | Secondary outcomes                                                                                                                                                                                                                                                                                                                                                                                                                                                                                                                                                                                                                                                                                                                                                                                           | Safety outcomes                                                                                                                                                                                                                                                                                                                                                                    |
|--------------------------------------------------------|------------------------------------------------------------------------------------------------------------|--------------------------------------------------------------------------------------------------------------------------------------------------------------------------------------------------------------------------------------------------------------------------------------------------------------------------------------------------------------------------------------------------------------------------------------------------------------------------------------------------------------------------------------------------------------------------------------------------------------------------------------------------------------------------------------------------------------------------------------------------------------------------------------------------------------|------------------------------------------------------------------------------------------------------------------------------------------------------------------------------------------------------------------------------------------------------------------------------------------------------------------------------------------------------------------------------------|
|                                                        |                                                                                                            | <ul style="list-style-type: none"> <li>• ICU-free days at 28 days (calculated as a worst-rank ordinal)</li> <li>• Time to a 1-point decrease in the WHO ordinal recovery score</li> </ul>                                                                                                                                                                                                                                                                                                                                                                                                                                                                                                                                                                                                                    | <ul style="list-style-type: none"> <li>• Arrhythmia</li> </ul>                                                                                                                                                                                                                                                                                                                     |
| NCT04344444<br>(University Medical Center New Orleans) | Composite incidence of death, transfer to ICU, initiation of mechanical ventilation, or initiation of ECMO | <ul style="list-style-type: none"> <li>• Toxicities of the drugs</li> <li>• SARS-CoV2 viral load over time</li> <li>• Length of hospital stay</li> <li>• Number of ICU days</li> <li>• Rate of readmission after hospital discharge</li> <li>• Duration of symptoms</li> </ul>                                                                                                                                                                                                                                                                                                                                                                                                                                                                                                                               | <ul style="list-style-type: none"> <li>• AEs monitored daily, including drug toxicity.</li> <li>• QTc monitoring via telemetry</li> </ul>                                                                                                                                                                                                                                          |
| OAHU-COVID19                                           | Clinical status (on a 7-point ordinal scale) at day 15                                                     | <ul style="list-style-type: none"> <li>• Time to an improvement of one category from admission using an ordinal scale</li> <li>• Subject clinical status using ordinal scale at days 3, 5, 8, 11, and 28</li> <li>• Mean change in the ordinal scale from baseline to days 3, 5, 8, 11, 15, and 28 from baseline</li> <li>• The time to discharge or to a National Early Warning Score (NEWS) of <math>\leq 2</math> and maintained for 24 hours, whichever occurs first</li> <li>• Oxygenation free days in the first 28 days</li> <li>• Incidence and duration of new oxygen use during the study</li> <li>• Ventilator-free days in the first 28 days</li> <li>• Incidence and duration of new mechanical ventilation use during hospitalization</li> <li>• Duration of hospitalization (days)</li> </ul> | <ul style="list-style-type: none"> <li>• 28-day mortality</li> <li>• Cumulative incidence of serious adverse events (SAEs) through 28-day follow-up</li> <li>• Cumulative incidence of Grade 3 and 4 adverse events</li> <li>• Discontinuation of hydroxychloroquine for any reason</li> <li>• Changes in WBC, Hb, Plt, Creat, CrCl, Gluc, Tot Bili, ALT, AST over time</li> </ul> |
