# Supplementary material for: Hydroxychloroquine/chloroquine for the treatment of hospitalized patients with COVID-19: An individual participant data meta-analysis
Source: bioRxiv or medRxiv preprint supplement (doi:10.1101/2022.01.10.22269008), 2022-08-16
Supplement: Supplementary file [file media-14.pdf]

**S6 Table. Merging Trial Arms**

| Trial                                                  | Treatment groups                      | Treatment days | Treatment or control? | Dose by treatment group                                                                                                                           |
|--------------------------------------------------------|---------------------------------------|----------------|-----------------------|---------------------------------------------------------------------------------------------------------------------------------------------------|
| ORCHID                                                 | 2                                     | 5 days         | T                     | HCQ: Day 1 400 mg twice daily; Days 2-5 200 mg twice daily                                                                                        |
|                                                        |                                       |                | C                     | Placebo                                                                                                                                           |
| WU352                                                  | 4                                     | 5 days         | T                     | HCQ: Day 1 400 mg twice daily; Days 2-5 200 mg twice daily                                                                                        |
|                                                        |                                       |                | T                     | HCQ + AZM: HCQ: Day 1 400 mg twice daily; Days 2-5 200 mg twice daily; AZM: Day 1 500 mg once; Days 2-5 250 mg once daily                         |
|                                                        |                                       |                | T                     | CQ: Day 1 1000 mg once followed by 500 mg in 12 hours; Days 2-5 500 mg twice daily                                                                |
|                                                        |                                       |                | T                     | CQ + AZM: CQ: Day 1 1000 mg once followed by 500 mg in 12 hours; Days 2-5 500 mg twice daily; AZM: Day 1 500 mg once; Days 2-5 250 mg once daily  |
| NCT04335552<br>(Duke University)                       | 2                                     | 5 days         | C                     | Arm 1: Supportive care alone                                                                                                                      |
|                                                        |                                       |                | T                     | Arm 2: Supportive care plus HCQ (Day 1 800 mg once; Days 2-5 600 mg once daily)                                                                   |
|                                                        |                                       |                | C                     | Arm 3: Supportive care plus azithromycin (Day 1 500 mg once; Days 2-5 250 mg once daily)                                                          |
|                                                        |                                       |                | T                     | Arm 4: Supportive care plus HCQ (Day 1 800 mg once; Days 2-5 600 mg once daily) plus azithromycin (Day 1 500 mg once; Days 2-5 250 mg once daily) |
| TEACH                                                  | 2                                     | 5 days         | T                     | HCQ: Day 1 400 mg twice daily; Days 2-5 200 mg twice daily                                                                                        |
|                                                        |                                       |                | C                     | Placebo                                                                                                                                           |
| COVID MED                                              | 4 (only Arms 2 and 4 included herein) | 14 days        | C                     | Arm 1: Standard care and lopinavir/ritonavir: Dosing: 400 mg/100 mg twice daily for 5-14 days                                                     |
|                                                        |                                       |                | T                     | Arm 2: Standard care and HCQ: Day 1 400 mg twice daily; Days 2-5 200 mg twice daily                                                               |
|                                                        |                                       |                | C                     | Arm 3: Standard care and losartan: Losartan 25 mg daily for 5-14 days; placebo daily for 5-14 days to replicate/control for twice-daily dosing    |
|                                                        |                                       |                | C                     | Arm 4: Standard care and placebo: Placebo twice daily for 5-14 days                                                                               |
| HAHPS                                                  | 2                                     | 5 days         | T                     | HCQ: Day 1 400 mg twice daily; Days 2-5 200 mg twice daily                                                                                        |
|                                                        |                                       |                | C                     | AZM: Day 1 500 mg once; Days 2-5 250 mg once daily                                                                                                |
| NCT04344444<br>(University Medical Center New Orleans) | 3                                     | 5 days         | C                     | Control: Supportive Care Only                                                                                                                     |
|                                                        |                                       |                | T                     | HCQ: Day 1 400 mg twice daily; Days 2-5 200 mg twice daily                                                                                        |
|                                                        |                                       |                | T                     | HCQ + AZM: HCQ: Day 1 400 mg twice daily; Days 2-5 200 mg twice daily; AZM: Day 1 500 mg once; Days 2-5 250 mg once daily                         |
| OAHU-COVID19                                           | 2                                     | 5 days         | T                     | HCQ: Day 1 400 mg twice daily; Days 2-5 200 mg twice daily                                                                                        |
|                                                        |                                       |                | C                     | Usual care                                                                                                                                        |
